# Supplementary material
Source: MDPI journal article supplement (https://www.mdpi.com/2076-3298/11/3/44)
Supplement: s1 [file s1]

# Biomass Production and Metal Remediation by *Salix alba* L. and *Salix viminalis* L. Irrigated with Greywater Treated by Floating Wetlands

## Supplementary Material

**Table S2.** Physiochemical characteristics of synthetic greywater (SGW).

| <b>a) Raw SGW</b>          |             |                                   |       |       |       |       |                                    |        |        |        |        |
|----------------------------|-------------|-----------------------------------|-------|-------|-------|-------|------------------------------------|--------|--------|--------|--------|
| <b>Parameter</b>           | <b>Unit</b> | <b>Inflow (low concentration)</b> |       |       |       |       | <b>Inflow (high concentration)</b> |        |        |        |        |
|                            |             | n                                 | Mean  | SD    | Min   | Max   | n                                  | Mean   | SD     | Min    | Max    |
| pH                         | —           | 81                                | 6.9   | 0.48  | 5.3   | 7.9   | 81                                 | 8.4    | 1.61   | 5.4    | 11.5   |
| Redox potential            | mV          | 81                                | 34.1  | 21.23 | -18.1 | 111.2 | 81                                 | -36.6  | 74.22  | -182.1 | 97.9   |
| Turbidity                  | NTU         | 81                                | 22.9  | 7.14  | 9.8   | 41.6  | 81                                 | 188.9  | 47.22  | 18.3   | 308.0  |
| Total suspended solids     | mg/L        | 81                                | 39.9  | 15.94 | 10.0  | 87.0  | 81                                 | 317.0  | 58.35  | 173.0  | 473.0  |
| Electrical conductivity    | µS/cm       | 81                                | 164.6 | 63.24 | 98.7  | 452.0 | 81                                 | 988.5  | 196.09 | 612.0  | 1677.0 |
| Dissolved oxygen           | mg/L        | 81                                | 10.4  | 1.24  | 7.7   | 12.3  | 81                                 | 10.5   | 1.39   | 6.9    | 12.6   |
| Colour                     | Pa/Co       | 81                                | 214.5 | 64.07 | 26.0  | 340.0 | 81                                 | 1587.8 | 379.89 | 787.0  | 2499.0 |
| Temperature                | °C          | 81                                | 17.7  | 4.58  | 6.7   | 27.0  | 81                                 | 16.9   | 5.40   | 6.5    | 27.8   |
| Biochemical oxygen demand  | mg/L        | 81                                | 17.6  | 8.00  | 2.0   | 40.0  | 81                                 | 34.7   | 12.99  | 10.0   | 60.0   |
| Chemical oxygen demand     | mg/L        | 81                                | 28.9  | 14.47 | 8.2   | 86.7  | 81                                 | 129.2  | 34.68  | 63.9   | 221.0  |
| Ammonia–nitrogen           | mg/L        | 81                                | 0.2   | 0.22  | 0.0   | 1.1   | 81                                 | 0.4    | 0.19   | 0.1    | 1.1    |
| Nitrate–nitrogen           | mg/L        | 81                                | 1.3   | 1.21  | 0.1   | 7.6   | 81                                 | 8.9    | 6.38   | 0.2    | 29.8   |
| Ortho–phosphate–phosphorus | mg/L        | 81                                | 8.4   | 4.36  | 3.3   | 27.4  | 81                                 | 59.1   | 14.16  | 30.6   | 94.2   |
| <b>Element</b>             |             |                                   |       |       |       |       |                                    |        |        |        |        |
| Aluminium                  | mg/L        | 45                                | 0.52  | 0.528 | 0.09  | 1.56  | 45                                 | 2.13   | 0.869  | 0.76   | 4.77   |
| Boron                      | mg/L        | 33                                | 0.14  | 0.067 | 0.10  | 0.36  | 33                                 | 0.57   | 0.068  | 0.49   | 0.72   |
| Calcium                    | mg/L        | 55                                | 10.54 | 0.853 | 8.51  | 11.81 | 45                                 | 36.08  | 8.750  | 22.38  | 50.72  |
| Cadmium                    | mg/L        | 42                                | 0.09  | 0.056 | 0.04  | 0.23  | 39                                 | 7.36   | 2.981  | 3.67   | 11.58  |
| Chromium                   | mg/L        | 54                                | 0.04  | 0.063 | 0.01  | 0.23  | 54                                 | 3.20   | 0.918  | 1.67   | 5.70   |
| Copper                     | mg/L        | 63                                | 0.16  | 0.058 | 0.10  | 0.30  | 63                                 | 1.44   | 0.435  | 0.95   | 2.03   |
| Iron                       | mg/L        | 48                                | 0.21  | 0.102 | 0.11  | 0.43  | 48                                 | 6.41   | 2.476  | 2.48   | 10.37  |
| Potassium                  | mg/L        | 12                                | 4.04  | 0.448 | 3.41  | 4.65  | 12                                 | 60.16  | 1.684  | 58.31  | 62.53  |
| Magnesium                  | mg/L        | 48                                | 1.45  | 0.191 | 1.19  | 1.78  | 48                                 | 17.16  | 2.119  | 12.68  | 20.33  |
| Manganese                  | mg/L        | 63                                | 0.17  | 0.084 | 0.07  | 0.26  | 63                                 | 0.98   | 0.257  | 0.64   | 1.29   |
| Sodium                     | mg/L        | 12                                | 14.32 | 1.662 | 12.01 | 16.00 | 12                                 | 62.68  | 14.538 | 45.50  | 76.92  |
| Nickel                     | mg/L        | 51                                | 0.04  | 0.065 | 0.01  | 0.18  | 51                                 | 0.05   | 0.065  | 0.01   | 0.20   |
| Zinc                       | mg/L        | 39                                | 0.21  | 0.159 | 0.01  | 0.39  | 39                                 | 4.25   | 1.500  | 2.22   | 6.34   |

Note: n, number of tested samples; SD, standard deviation; Min, minimum; Max, maximum; and NTU, nephelometric turbidity unit.

**Table S2. Cont.**

b) HC–SGW (2–day HRT)

| <i>Parameter</i>                    | <i>Unit</i> | <i>n</i> | <i>2–day outflow (HC)–T1</i> |        |        |        |         | <i>n</i> | <i>2–day outflow (HC)–T2</i> |        |        |        |         |
|-------------------------------------|-------------|----------|------------------------------|--------|--------|--------|---------|----------|------------------------------|--------|--------|--------|---------|
|                                     |             |          | Mean                         | SD     | Min    | Max    | Rem (%) |          | Mean                         | SD     | Min    | Max    | Rem (%) |
| pH                                  | –           | 85       | 7.4                          | 1.09   | 5.7    | 9.5    | na      | 36       | 8.8                          | 1.69   | 6.6    | 12.5   | na      |
| Redox potential                     | mV          | 85       | 8.1                          | 52.68  | -89.5  | 87.2   | na      | 36       | -54.8                        | 83.66  | -227.7 | 56.7   | na      |
| Turbidity                           | NTU         | 85       | 175.9                        | 59.61  | 39.8   | 319.0  | 6.9     | 36       | 223.8                        | 97.40  | 88.9   | 434.0  | -18.5   |
| Total suspended solids              | mg/L        | 85       | 302.9                        | 75.19  | 79.0   | 455.0  | 4.4     | 36       | 422.5                        | 152.77 | 178.0  | 662.0  | -33.3   |
| Electrical conductivity             | µS/cm       | 85       | 987.4                        | 107.25 | 713.0  | 1225.0 | na      | 36       | 1174.5                       | 282.81 | 766.0  | 1924.0 | na      |
| Dissolved oxygen                    | mg/L        | 85       | 9.0                          | 1.03   | 5.5    | 11.9   | 14.3    | 36       | 9.0                          | 1.24   | 6.5    | 12.2   | 14.3    |
| Colour                              | Pa/Co       | 85       | 1525.6                       | 411.54 | 455.0  | 2361.0 | 3.9     | 36       | 2150.8                       | 864.04 | 784.0  | 4175.0 | -35.5   |
| Temperature                         | °C          | 85       | 17.1                         | 4.92   | 5.8    | 24.6   | na      | 36       | 17.4                         | 4.87   | 6.0    | 23.8   | na      |
| Biochemical oxygen demand           | mg/L        | 85       | 17.7                         | 6.40   | 0.0    | 30.0   | 49.0    | 36       | 11.1                         | 5.89   | 0.0    | 28.0   | 68.0    |
| Chemical oxygen demand              | mg/L        | 85       | 96.3                         | 32.01  | 33.8   | 172.0  | 25.5    | 36       | 109.2                        | 24.38  | 56.9   | 151.0  | 15.5    |
| Ammonia–nitrogen                    | mg/L        | 85       | 0.4                          | 0.21   | 0.0    | 1.2    | 0.0     | 36       | 0.4                          | 0.13   | 0.2    | 0.7    | 0.0     |
| Nitrate–nitrogen                    | mg/L        | 85       | 14.1                         | 6.40   | 0.2    | 32.0   | -58.4   | 36       | 14.3                         | 5.02   | 4.7    | 26.5   | -60.7   |
| Ortho–phosphate–phosphorus          | mg/L        | 85       | 52.0                         | 14.87  | 15.8   | 95.5   | 12.0    | 36       | 21.1                         | 5.81   | 6.9    | 29.2   | 64.3    |
| <b><i>Element</i></b>               |             |          |                              |        |        |        |         |          |                              |        |        |        |         |
| Aluminium                           | mg/L        | 39       | 1.54                         | 1.479  | 0.30   | 5.04   | 27.70   | 39       | 2.02                         | 1.624  | 0.48   | 4.94   | 5.16    |
| Boron                               | mg/L        | 35       | 0.53                         | 0.086  | 0.43   | 0.73   | 7.02    | 35       | 0.41                         | 0.079  | 0.34   | 0.57   | 28.07   |
| Calcium                             | mg/L        | 37       | 42.50                        | 4.561  | 34.22  | 49.76  | -17.79  | 37       | 81.39                        | 23.641 | 46.90  | 115.66 | -125.58 |
| Cadmium                             | mg/L        | 42       | 4.90                         | 2.730  | 1.55   | 8.93   | 33.42   | 42       | 4.10                         | 1.839  | 1.79   | 7.25   | 44.36   |
| Chromium                            | mg/L        | 58       | 2.48                         | 2.060  | 0.59   | 6.69   | 22.50   | 58       | 2.74                         | 2.021  | 0.83   | 5.85   | 14.38   |
| Copper                              | mg/L        | 63       | 0.95                         | 0.561  | 0.29   | 1.57   | 34.03   | 63       | 0.90                         | 0.375  | 0.44   | 1.36   | 37.50   |
| Iron                                | mg/L        | 51       | 4.31                         | 2.928  | 1.08   | 9.02   | 32.76   | 51       | 4.71                         | 2.744  | 1.37   | 8.10   | 26.52   |
| Potassium                           | mg/L        | 14       | 52.79                        | 1.322  | 50.41  | 54.90  | 12.25   | 14       | 54.03                        | 11.214 | 44.74  | 71.52  | 10.19   |
| Magnesium                           | mg/L        | 48       | 17.32                        | 1.296  | 14.49  | 20.30  | -0.93   | 48       | 11.01                        | 2.533  | 7.57   | 14.16  | 35.84   |
| Manganese                           | mg/L        | 63       | 0.48                         | 0.320  | 0.10   | 0.91   | 51.02   | 63       | 0.51                         | 0.255  | 0.29   | 0.97   | 47.96   |
| Sodium                              | mg/L        | 14       | 58.54                        | 11.080 | 42.44  | 73.63  | 6.60    | 14       | 56.95                        | 9.494  | 42.01  | 67.61  | 6.18    |
| Nickel                              | mg/L        | 53       | 0.02                         | 0.019  | 0.00   | 0.06   | 60.00   | 53       | 0.02                         | 0.019  | 0.00   | 0.08   | 60.00   |
| Zinc                                | mg/L        | 44       | 2.86                         | 1.680  | 0.70   | 4.70   | 32.71   | 44       | 2.58                         | 1.114  | 1.01   | 4.18   | 39.29   |
| <b><i>2–day outflow (HC)–T3</i></b> |             |          |                              |        |        |        |         |          |                              |        |        |        |         |
| <b><i>2–day outflow (HC)–T4</i></b> |             |          |                              |        |        |        |         |          |                              |        |        |        |         |
| pH                                  | –           | 85       | 7.8                          | 1.37   | 5.6    | 9.8    | na      | 36       | 8.7                          | 1.73   | 6.6    | 12.7   | na      |
| Redox potential                     | mV          | 85       | -3.0                         | 62.95  | -107.6 | 88.6   | na      | 36       | -49.9                        | 83.61  | -232.8 | 42.1   | na      |
| Turbidity                           | NTU         | 85       | 192.1                        | 50.87  | 102.0  | 341.0  | -1.7    | 36       | 191.3                        | 84.41  | 106.0  | 456.0  | -1.3    |
| Total suspended solids              | mg/L        | 85       | 321.8                        | 56.68  | 165.0  | 447.0  | -1.5    | 36       | 337.4                        | 109.45 | 161.0  | 661.0  | -6.4    |
| Electrical conductivity             | µS/cm       | 85       | 965.2                        | 106.68 | 627.0  | 1208.0 | na      | 36       | 1178.4                       | 264.41 | 806.0  | 1944.0 | na      |
| Dissolved oxygen                    | mg/L        | 85       | 10.2                         | 0.73   | 8.7    | 12.1   | 2.9     | 36       | 10.0                         | 0.52   | 8.9    | 10.9   | 4.8     |
| Colour                              | Pa/Co       | 85       | 1527.6                       | 326.28 | 677.0  | 2311.0 | 3.8     | 36       | 1935.6                       | 702.18 | 702.0  | 3438.0 | -21.9   |
| Temperature                         | °C          | 85       | 17.1                         | 4.75   | 6.1    | 23.6   | na      | 36       | 17.2                         | 4.73   | 6.0    | 23.4   | na      |
| Biochemical oxygen demand           | mg/L        | 85       | 14.7                         | 7.78   | 0.0    | 40.0   | 57.6    | 36       | 11.7                         | 7.71   | 0.0    | 35.0   | 66.3    |
| Chemical oxygen demand              | mg/L        | 85       | 106.6                        | 22.68  | 43.3   | 164.0  | 17.5    | 36       | 100.3                        | 21.08  | 41.7   | 131.0  | 22.4    |
| Ammonia–nitrogen                    | mg/L        | 85       | 0.4                          | 0.16   | 0.0    | 0.9    | 0.0     | 36       | 0.4                          | 0.09   | 0.2    | 0.6    | 0.0     |
| Nitrate–nitrogen                    | mg/L        | 85       | 9.4                          | 4.67   | 0.5    | 24.0   | -5.6    | 36       | 12.9                         | 7.03   | 2.4    | 26.9   | -44.9   |
| Ortho–phosphate–phosphorus          | mg/L        | 85       | 46.2                         | 10.74  | 23.7   | 70.1   | 21.8    | 36       | 19.5                         | 4.98   | 9.0    | 30.3   | 67.0    |
| <b><i>Element</i></b>               |             |          |                              |        |        |        |         |          |                              |        |        |        |         |
| Aluminium                           | mg/L        | 39       | 2.41                         | 1.016  | 0.74   | 4.25   | -13.15  | 39       | 2.98                         | 2.087  | 0.84   | 7.14   | -39.91  |
| Boron                               | mg/L        | 35       | 0.54                         | 0.060  | 0.42   | 0.66   | 5.26    | 35       | 0.50                         | 0.078  | 0.40   | 0.68   | 12.28   |
| Calcium                             | mg/L        | 37       | 43.02                        | 2.411  | 35.94  | 46.28  | -19.24  | 37       | 104.13                       | 32.868 | 46.28  | 141.65 | -188.61 |
| Cadmium                             | mg/L        | 42       | 7.69                         | 1.064  | 4.95   | 8.98   | -4.48   | 42       | 7.14                         | 2.429  | 4.23   | 11.75  | 2.99    |
| Chromium                            | mg/L        | 58       | 3.76                         | 1.203  | 1.34   | 4.98   | -17.5   | 58       | 3.99                         | 1.806  | 1.87   | 7.03   | -24.69  |
| Copper                              | mg/L        | 63       | 1.45                         | 0.113  | 1.28   | 1.70   | -0.69   | 63       | 1.55                         | 0.308  | 1.23   | 2.09   | -7.64   |
| Iron                                | mg/L        | 51       | 6.35                         | 2.423  | 1.56   | 9.29   | 0.94    | 51       | 7.11                         | 2.934  | 2.60   | 11.55  | -10.92  |
| Potassium                           | mg/L        | 14       | 55.68                        | 4.486  | 49.48  | 60.69  | 7.45    | 14       | 60.47                        | 15.561 | 49.85  | 85.46  | -0.52   |
| Magnesium                           | mg/L        | 48       | 17.76                        | 1.392  | 13.92  | 19.55  | -0.20   | 48       | 13.33                        | 4.526  | 7.53   | 19.80  | 22.32   |
| Manganese                           | mg/L        | 63       | 1.19                         | 0.063  | 1.06   | 1.29   | -21.4   | 63       | 0.89                         | 0.396  | 0.61   | 1.59   | 9.18    |
| Sodium                              | mg/L        | 14       | 58.19                        | 10.620 | 42.35  | 68.22  | 7.16    | 14       | 58.54                        | 11.630 | 41.37  | 76.33  | 6.60    |
| Nickel                              | mg/L        | 53       | 0.03                         | 0.018  | 0.00   | 0.06   | 40.00   | 53       | 0.03                         | 0.033  | 0.00   | 0.10   | 40.00   |
| Zinc                                | mg/L        | 44       | 4.30                         | 0.524  | 3.12   | 5.25   | -1.42   | 44       | 4.52                         | 0.961  | 2.90   | 6.40   | -6.35   |

*Note:* HC, high pollutant concentrations; T1, treatment system with only *P. australis*; T2, treatment system with *P. australis* and ochre pellets; T3, treatment system without *P. australis* or ochre pellets; T4, treatment system with only ochre pellets; n, number of tested samples; SD, standard deviation; Min, minimum; Max, maximum; Rem, removal; NTU, nephelometric turbidity unit; na, not applicable.

**Table S2. Cont.**

c) LC-SGW (2-day HRT)

| <i>Parameter</i>                    | <i>Unit</i> | <i>2-day outflow (LC)–T5</i> |       |       |        |       |         | <i>2-day outflow (LC)–T6</i> |        |        |        |        |         |
|-------------------------------------|-------------|------------------------------|-------|-------|--------|-------|---------|------------------------------|--------|--------|--------|--------|---------|
|                                     |             | n                            | Mean  | SD    | Min    | Max   | Rem (%) | n                            | Mean   | SD     | Min    | Max    | Rem (%) |
| pH                                  | –           | 85                           | 7.0   | 0.71  | 6.1    | 10.2  | na      | 36                           | 10.5   | 1.12   | 8.0    | 12.5   | na      |
| Redox potential                     | mV          | 85                           | 27.5  | 32.18 | -120.8 | 72.4  | na      | 36                           | -137.4 | 54.91  | -224.8 | -15.0  | na      |
| Turbidity                           | NTU         | 85                           | 28.2  | 37.09 | 3.4    | 262.0 | -23.1   | 36                           | 39.2   | 45.10  | 9.8    | 260.0  | -71.2   |
| Total suspended solids              | mg/L        | 85                           | 41.7  | 43.57 | 8.0    | 316.0 | -4.5    | 36                           | 62.0   | 49.93  | 13.0   | 262.0  | -55.4   |
| Electrical conductivity             | µS/cm       | 85                           | 145.9 | 30.41 | 15.5   | 325.0 | na      | 36                           | 371.5  | 260.12 | 4.1    | 1307.0 | na      |
| Dissolved oxygen                    | mg/L        | 85                           | 9.3   | 1.08  | 6.9    | 12.5  | 10.6    | 36                           | 8.8    | 0.87   | 6.5    | 10.6   | 15.4    |
| Colour                              | Pa/Co       | 85                           | 183.7 | 74.89 | 73.0   | 476.0 | 14.4    | 36                           | 308.2  | 134.65 | 103.0  | 683.0  | -43.7   |
| Temperature                         | °C          | 85                           | 17.0  | 4.84  | 6.0    | 23.0  | na      | 36                           | 16.6   | 4.55   | 6.2    | 22.9   | na      |
| Biochemical oxygen demand           | mg/L        | 85                           | 9.9   | 5.49  | 0.0    | 30.0  | 43.8    | 36                           | 5.4    | 4.36   | 0.0    | 18.0   | 69.3    |
| Chemical oxygen demand              | mg/L        | 85                           | 32.4  | 14.55 | 10.6   | 89.6  | -13.8   | 36                           | 29.6   | 16.67  | 9.6    | 73.4   | -2.4    |
| Ammonia–nitrogen                    | mg/L        | 85                           | 0.1   | 0.07  | 0.0    | 0.3   | 50.0    | 36                           | 0.2    | 0.14   | 0.0    | 0.5    | 0.0     |
| Nitrate–nitrogen                    | mg/L        | 85                           | 1.7   | 1.13  | 0.0    | 5.8   | -30.8   | 36                           | 0.4    | 0.33   | 0.0    | 1.6    | 69.2    |
| Ortho–phosphate–phosphorus          | mg/L        | 85                           | 7.6   | 3.90  | 3.2    | 120   | 9.5     | 36                           | 3.2    | 1.16   | 1.5    | 6.4    | 86.2    |
| <b><i>Element</i></b>               |             |                              |       |       |        |       |         |                              |        |        |        |        |         |
| Aluminium                           | mg/L        | 39                           | 0.08  | 0.054 | 0.01   | 0.19  | 84.62   | 39                           | 1.07   | 0.874  | 0.08   | 2.54   | -105.77 |
| Boron                               | mg/L        | 35                           | 0.11  | 0.010 | 0.10   | 0.14  | 21.43   | 35                           | 0.09   | 0.011  | 0.08   | 0.11   | 35.71   |
| Calcium                             | mg/L        | 46                           | 11.51 | 0.926 | 10.01  | 13.18 | -9.20   | 37                           | 45.13  | 11.676 | 27.19  | 63.22  | -332.07 |
| Cadmium                             | mg/L        | 42                           | 0.04  | 0.020 | 0.00   | 0.08  | 55.56   | 42                           | 0.03   | 0.019  | 0.00   | 0.07   | 66.67   |
| Chromium                            | mg/L        | 58                           | 0.03  | 0.036 | 0.00   | 0.10  | 25.00   | 58                           | 0.03   | 0.033  | 0.00   | 0.09   | 25.00   |
| Copper                              | mg/L        | 63                           | 0.04  | 0.029 | 0.01   | 0.09  | 75.00   | 63                           | 0.04   | 0.035  | 0.00   | 0.10   | 75.00   |
| Iron                                | mg/L        | 51                           | 0.15  | 0.118 | 0.04   | 0.33  | 28.57   | 51                           | 0.21   | 0.202  | 0.05   | 0.54   | 0.00    |
| Potassium                           | mg/L        | 14                           | 3.40  | 0.675 | 2.50   | 4.36  | 15.84   | 14                           | 10.78  | 10.185 | 2.97   | 27.17  | -166.83 |
| Magnesium                           | mg/L        | 48                           | 1.36  | 0.157 | 1.05   | 1.62  | 6.21    | 48                           | 0.63   | 0.310  | 0.23   | 0.95   | 56.55   |
| Manganese                           | mg/L        | 63                           | 0.01  | 0.012 | 0.00   | 0.06  | 94.12   | 63                           | 0.04   | 0.031  | 0.00   | 0.11   | 76.47   |
| Sodium                              | mg/L        | 14                           | 14.74 | 1.282 | 13.12  | 18.08 | -2.93   | 14                           | 15.90  | 1.869  | 13.87  | 18.80  | -11.03  |
| Nickel                              | mg/L        | 53                           | 0.004 | 0.006 | 0.00   | 0.04  | 90.00   | 53                           | 0.01   | 0.010  | 0.00   | 0.06   | 75.00   |
| Zinc                                | mg/L        | 42                           | 0.06  | 0.066 | 0.00   | 0.17  | 71.43   | 42                           | 0.04   | 0.054  | 0.00   | 0.17   | 80.92   |
| <b><i>2-day outflow (LC)–T7</i></b> |             |                              |       |       |        |       |         |                              |        |        |        |        |         |
| pH                                  | –           | 85                           | 7.5   | 0.70  | 6.3    | 10.1  | na      | 36                           | 10.6   | 0.99   | 8.5    | 12.5   | na      |
| Redox potential                     | mV          | 85                           | 4.2   | 30.40 | -116.1 | 51.0  | na      | 36                           | -143.5 | 51.01  | -238.1 | -30.3  | na      |
| Turbidity                           | NTU         | 85                           | 20.2  | 14.20 | 2.9    | 129.0 | 11.8    | 36                           | 35.6   | 18.11  | 8.7    | 79.3   | -55.5   |
| Total suspended solids              | mg/L        | 85                           | 30.0  | 12.12 | 11.0   | 76.0  | 24.8    | 36                           | 66.2   | 36.63  | 13.0   | 181.0  | -65.9   |
| Electrical conductivity             | µS/cm       | 85                           | 138.5 | 23.26 | 79.0   | 215.0 | na      | 36                           | 344.5  | 287.03 | 168.4  | 1534.0 | na      |
| Dissolved oxygen                    | mg/L        | 85                           | 10.5  | 0.82  | 8.2    | 12.6  | -1.0    | 36                           | 10.1   | 0.73   | 6.5    | 10.8   | 2.9     |
| Colour                              | Pa/Co       | 85                           | 164.5 | 40.93 | 34.0   | 265.0 | 23.3    | 36                           | 331.7  | 119.34 | 104.0  | 552.0  | -54.6   |
| Temperature                         | °C          | 85                           | 16.0  | 4.59  | 5.3    | 21.8  | na      | 36                           | 16.3   | 4.24   | 6.3    | 21.3   | na      |
| Biochemical oxygen demand           | mg/L        | 85                           | 5.6   | 3.60  | 0.0    | 20.0  | 68.2    | 36                           | 4.4    | 5.13   | 0.0    | 22.0   | 75.0    |
| Chemical oxygen demand              | mg/L        | 85                           | 26.8  | 6.18  | 15.4   | 41.9  | 7.3     | 36                           | 24.0   | 4.99   | 15.4   | 39.9   | 17.0    |
| Ammonia–nitrogen                    | mg/L        | 85                           | 0.09  | 0.05  | 0.0    | 0.3   | 55.0    | 36                           | 0.1    | 0.04   | 0.1    | 0.2    | 50.0    |
| Nitrate–nitrogen                    | mg/L        | 85                           | 1.2   | 0.71  | 0.1    | 3.2   | 7.7     | 36                           | 0.6    | 0.54   | 0.0    | 2.6    | 53.8    |
| Ortho–phosphate–phosphorus          | mg/L        | 85                           | 7.0   | 3.89  | 3.0    | 18.8  | 16.7    | 36                           | 3.9    | 1.25   | 2.2    | 7.1    | 53.6    |
| <b><i>Element</i></b>               |             |                              |       |       |        |       |         |                              |        |        |        |        |         |
| Aluminium                           | mg/L        | 39                           | 0.34  | 0.180 | 0.11   | 0.72  | 34.62   | 39                           | 0.76   | 0.347  | 0.16   | 1.24   | -46.15  |
| Boron                               | mg/L        | 35                           | 0.11  | 0.009 | 0.08   | 0.13  | 21.43   | 35                           | 0.10   | 0.024  | 0.07   | 0.13   | 28.57   |
| Calcium                             | mg/L        | 46                           | 11.25 | 0.773 | 9.86   | 12.70 | -6.74   | 37                           | 70.99  | 33.166 | 21.66  | 109.98 | -573.53 |
| Cadmium                             | mg/L        | 42                           | 0.05  | 0.031 | 0.00   | 0.11  | 44.44   | 42                           | 0.04   | 0.030  | 0.00   | 0.10   | 55.56   |
| Chromium                            | mg/L        | 58                           | 0.04  | 0.049 | 0.00   | 0.12  | 0.00    | 58                           | 0.05   | 0.039  | 0.00   | 0.12   | -25.00  |
| Copper                              | mg/L        | 63                           | 0.06  | 0.049 | 0.02   | 0.15  | 62.50   | 63                           | 0.05   | 0.043  | 0.01   | 0.13   | 68.75   |
| Iron                                | mg/L        | 51                           | 0.21  | 0.157 | 0.09   | 0.45  | 0.00    | 51                           | 0.48   | 0.447  | 0.15   | 1.26   | -128.57 |
| Potassium                           | mg/L        | 14                           | 3.87  | 0.364 | 3.35   | 4.50  | 4.21    | 14                           | 12.77  | 15.139 | 2.73   | 36.71  | -216.09 |
| Magnesium                           | mg/L        | 48                           | 1.35  | 0.133 | 0.99   | 1.58  | 6.90    | 48                           | 0.70   | 0.336  | 0.28   | 1.15   | 51.72   |
| Manganese                           | mg/L        | 63                           | 0.08  | 0.056 | 0.00   | 0.18  | 52.94   | 63                           | 0.08   | 0.069  | 0.00   | 0.20   | 52.94   |
| Sodium                              | mg/L        | 14                           | 13.82 | 1.175 | 12.14  | 15.57 | 3.49    | 14                           | 15.35  | 3.197  | 12.32  | 20.34  | -7.19   |
| Nickel                              | mg/L        | 53                           | 0.01  | 0.007 | 0.00   | 0.04  | 75.00   | 53                           | 0.01   | 0.012  | 0.00   | 0.06   | 75.00   |
| Zinc                                | mg/L        | 42                           | 0.09  | 0.083 | 0.00   | 0.23  | 57.14   | 42                           | 0.07   | 0.084  | 0.00   | 0.29   | 66.67   |

*Note:* LC, low pollutant concentrations; T5, treatment system with only *P. australis*; T6, treatment system with *P. australis* and ochre pellets; T7, treatment system without *P. australis* or ochre pellets; T8, treatment system with only ochre pellets; n, number of tested samples; SD, standard deviation; Min, minimum; Max, maximum; Rem, removal; NTU, nephelometric turbidity unit; na, not applicable.

**Table S2. Cont.**

d) HC–SGW (7–day HRT)

| <i>Parameter</i>                     | <i>Unit</i> | <i>7–day outflow (HC)–T9</i> |        |        |        |        |         | <i>7–day outflow (HC)–T10</i> |        |        |        |        |         |
|--------------------------------------|-------------|------------------------------|--------|--------|--------|--------|---------|-------------------------------|--------|--------|--------|--------|---------|
|                                      |             | n                            | Mean   | SD     | Min    | Max    | Rem (%) | n                             | Mean   | SD     | Min    | Max    | Rem (%) |
| pH                                   | –           | 83                           | 7.3    | 0.82   | 5.9    | 8.8    | na      | 34                            | 9.8    | 1.34   | 7.3    | 12.3   | na      |
| Redox potential                      | mV          | 83                           | 12.2   | 40.30  | -57.6  | 77.5   | na      | 34                            | -100.1 | 66.45  | -217.4 | 22.3   | na      |
| Turbidity                            | NTU         | 83                           | 154.8  | 86.08  | 9.8    | 430.0  | 18.1    | 34                            | 178.8  | 98.79  | 23.8   | 356.0  | 5.3     |
| Total suspended solids               | mg/L        | 83                           | 267.8  | 110.05 | 26.0   | 458.0  | 15.5    | 34                            | 342.9  | 125.33 | 48.0   | 581.0  | -8.2    |
| Electrical conductivity              | µS/cm       | 83                           | 1137.4 | 471.09 | 475.0  | 3010.0 | na      | 34                            | 1191.1 | 343.72 | 733.0  | 1871.0 | na      |
| Dissolved oxygen                     | mg/L        | 83                           | 8.8    | 0.89   | 6.5    | 11.0   | 16.2    | 34                            | 8.3    | 1.03   | 6.4    | 10.7   | 21.0    |
| Colour                               | Pa/Co       | 83                           | 1448.1 | 647.98 | 106.0  | 2941.0 | 8.8     | 34                            | 1593.5 | 761.50 | 226.0  | 2924.0 | -0.4    |
| Temperature                          | °C          | 83                           | 16.8   | 4.03   | 7.2    | 22.5   | na      | 34                            | 18.0   | 4.14   | 7.3    | 22.6   | na      |
| Biochemical oxygen demand            | mg/L        | 83                           | 23.1   | 9.35   | 8.0    | 40.0   | 33.4    | 34                            | 12.1   | 7.32   | 2.0    | 32.0   | 65.1    |
| Chemical oxygen demand               | mg/L        | 83                           | 94.0   | 31.13  | 16.2   | 161.5  | 27.2    | 34                            | 90.7   | 29.89  | 47.6   | 177.0  | 30.0    |
| Ammonia–nitrogen                     | mg/L        | 83                           | 0.5    | 0.23   | 0.2    | 1.2    | -25.0   | 34                            | 0.3    | 0.14   | 0.1    | 0.8    | 25.0    |
| Nitrate–nitrogen                     | mg/L        | 83                           | 10.7   | 7.92   | 0.9    | 37.9   | -20.2   | 34                            | 16.3   | 4.89   | 6.2    | 34.5   | -83.1   |
| Ortho–phosphate–phosphorus           | mg/L        | 83                           | 48.0   | 13.76  | 23.1   | 76.3   | 18.9    | 34                            | 16.3   | 3.00   | 3.0    | 38.1   | 72.4    |
| <b><i>Element</i></b>                |             |                              |        |        |        |        |         |                               |        |        |        |        |         |
| Aluminium                            | mg/L        | 54                           | 2.33   | 1.321  | 0.21   | 5.12   | -9.39   | 39                            | 1.56   | 0.880  | 0.35   | 3.71   | 26.76   |
| Boron                                | mg/L        | 26                           | 0.55   | 0.211  | 0.33   | 0.92   | 3.50    | 23                            | 0.44   | 0.202  | 0.26   | 0.91   | 22.81   |
| Calcium                              | mg/L        | 52                           | 42.49  | 4.386  | 31.32  | 48.65  | -17.77  | 37                            | 77.22  | 42.765 | 39.17  | 150.14 | -114.02 |
| Cadmium                              | mg/L        | 36                           | 5.82   | 2.238  | 2.28   | 9.84   | 20.92   | 30                            | 4.61   | 2.126  | 1.73   | 8.90   | 37.36   |
| Chromium                             | mg/L        | 46                           | 3.22   | 1.736  | 0.93   | 6.78   | -0.63   | 40                            | 2.86   | 1.328  | 1.24   | 5.16   | 10.63   |
| Copper                               | mg/L        | 54                           | 1.15   | 0.385  | 0.63   | 1.94   | 20.14   | 45                            | 0.98   | 0.308  | 0.62   | 1.74   | 31.94   |
| Iron                                 | mg/L        | 42                           | 5.45   | 1.657  | 3.34   | 9.40   | 14.98   | 36                            | 5.03   | 1.475  | 2.81   | 6.86   | 21.53   |
| Potassium                            | mg/L        | 8                            | 44.90  | 2.827  | 41.21  | 48.07  | 25.37   | 8                             | 56.58  | 19.919 | 36.93  | 77.55  | 5.95    |
| Magnesium                            | mg/L        | 54                           | 17.77  | 3.477  | 12.22  | 22.55  | -3.55   | 42                            | 12.84  | 6.124  | 5.36   | 22.80  | 25.17   |
| Manganese                            | mg/L        | 54                           | 0.35   | 0.249  | 0.09   | 0.82   | 64.29   | 45                            | 0.46   | 0.212  | 0.19   | 0.77   | 53.06   |
| Sodium                               | mg/L        | 8                            | 55.09  | 11.391 | 42.72  | 66.71  | 12.11   | 8                             | 55.85  | 12.850 | 42.23  | 74.21  | 10.90   |
| Nickel                               | mg/L        | 50                           | 0.10   | 0.091  | 0.00   | 0.23   | -100.0  | 41                            | 0.05   | 0.077  | 0.00   | 0.20   | 0.00    |
| Zinc                                 | mg/L        | 32                           | 3.12   | 0.872  | 1.76   | 4.60   | 26.59   | 29                            | 2.78   | 0.859  | 1.62   | 4.27   | 34.59   |
| <b><i>7–day outflow (HC)–T11</i></b> |             |                              |        |        |        |        |         |                               |        |        |        |        |         |
| pH                                   | –           | 83                           | 7.7    | 1.21   | 5.9    | 9.9    | na      | 34                            | 9.8    | 1.54   | 7.1    | 12.3   | na      |
| Redox potential                      | mV          | 83                           | -4.4   | 59.67  | -108.3 | 78.1   | na      | 34                            | -95.5  | 88.21  | -216.7 | 157.8  | na      |
| Turbidity                            | NTU         | 83                           | 185.7  | 49.24  | 65.1   | 281.0  | 1.7     | 34                            | 245.8  | 96.29  | 60.0   | 497.0  | -30.1   |
| Total suspended solids               | mg/L        | 83                           | 302.6  | 61.44  | 147.0  | 434.0  | 4.5     | 34                            | 423.4  | 114.04 | 120.0  | 692.0  | -33.6   |
| Electrical conductivity              | µS/cm       | 83                           | 1003.0 | 306.88 | 492.0  | 2460.0 | na      | 34                            | 1107.1 | 299.47 | 734.0  | 1814.0 | na      |
| Dissolved oxygen                     | mg/L        | 83                           | 10.5   | 0.91   | 7.9    | 12.0   | 0.0     | 34                            | 9.8    | 1.19   | 5.4    | 11.7   | 6.7     |
| Colour                               | Pa/Co       | 83                           | 1644.8 | 489.96 | 718.0  | 2889.0 | -3.6    | 34                            | 2040.5 | 757.57 | 688.0  | 3282.0 | -28.5   |
| Temperature                          | °C          | 83                           | 16.6   | 3.87   | 7.6    | 22.1   | na      | 34                            | 17.7   | 4.20   | 7.4    | 22.3   | na      |
| Biochemical oxygen demand            | mg/L        | 83                           | 16.6   | 7.07   | 4.0    | 38.0   | 52.2    | 34                            | 8.3    | 4.23   | 0.0    | 18.0   | 76.1    |
| Chemical oxygen demand               | mg/L        | 83                           | 100.8  | 27.65  | 11.6   | 159.5  | 22.0    | 34                            | 103.1  | 16.10  | 75.6   | 135.0  | 20.2    |
| Ammonia–nitrogen                     | mg/L        | 83                           | 0.3    | 0.13   | 0.0    | 0.8    | 25.0    | 34                            | 0.3    | 0.11   | 0.1    | 0.5    | 25.0    |
| Nitrate–nitrogen                     | mg/L        | 83                           | 8.5    | 8.42   | 0.4    | 34.5   | 4.5     | 34                            | 15.0   | 8.59   | 3.7    | 38.7   | -68.5   |
| Ortho–phosphate–phosphorus           | mg/L        | 83                           | 43.0   | 13.78  | 20.25  | 79.4   | 27.2    | 34                            | 17.3   | 5.63   | 3.8    | 32.8   | 70.7    |
| <b><i>Element</i></b>                |             |                              |        |        |        |        |         |                               |        |        |        |        |         |
| Aluminium                            | mg/L        | 54                           | 2.98   | 1.218  | 1.61   | 6.14   | -39.91  | 24                            | 3.61   | 2.306  | 0.87   | 6.67   | -69.48  |
| Boron                                | mg/L        | 26                           | 0.54   | 0.160  | 0.34   | 0.77   | 5.26    | 20                            | 0.39   | 0.078  | 0.30   | 0.51   | 31.58   |
| Calcium                              | mg/L        | 52                           | 37.39  | 4.030  | 30.58  | 45.66  | -3.63   | 22                            | 145.67 | 92.506 | 40.36  | 243.66 | -303.74 |
| Cadmium                              | mg/L        | 36                           | 6.40   | 1.984  | 3.86   | 9.72   | 13.59   | 24                            | 6.87   | 2.628  | 3.33   | 10.27  | 6.66    |
| Chromium                             | mg/L        | 46                           | 4.76   | 1.215  | 2.83   | 6.68   | -48.75  | 34                            | 4.75   | 2.021  | 2.57   | 6.89   | -48.44  |
| Copper                               | mg/L        | 54                           | 1.30   | 0.301  | 0.80   | 1.76   | 9.72    | 36                            | 1.47   | 0.247  | 1.14   | 1.80   | -2.08   |
| Iron                                 | mg/L        | 42                           | 7.02   | 1.801  | 3.58   | 9.36   | -9.52   | 30                            | 8.69   | 2.012  | 6.48   | 10.99  | -35.57  |
| Potassium                            | mg/L        | 8                            | 45.77  | 5.160  | 39.87  | 51.00  | 23.92   | 8                             | 59.62  | 20.132 | 39.79  | 79.86  | 0.90    |
| Magnesium                            | mg/L        | 54                           | 16.24  | 1.971  | 11.76  | 18.35  | 5.36    | 30                            | 12.97  | 3.785  | 7.71   | 17.80  | 24.42   |
| Manganese                            | mg/L        | 54                           | 1.01   | 0.223  | 0.75   | 1.38   | -3.06   | 36                            | 0.86   | 0.457  | 0.33   | 1.42   | 12.24   |
| Sodium                               | mg/L        | 8                            | 55.22  | 11.852 | 41.86  | 67.68  | 11.90   | 8                             | 55.59  | 12.232 | 42.05  | 68.09  | 11.31   |
| Nickel                               | mg/L        | 50                           | 0.09   | 0.081  | 0.00   | 0.20   | -80.00  | 32                            | 0.04   | 0.033  | 0.00   | 0.10   | 20.00   |
| Zinc                                 | mg/L        | 32                           | 3.90   | 0.972  | 1.90   | 5.10   | 8.02    | 26                            | 4.32   | 0.787  | 3.01   | 5.69   | -1.65   |

*Note:* HC, high pollutant concentrations; T9, treatment system with only *P. australis*; T10, treatment system with *P. australis* and ochre pellets; T11, treatment system without *P. australis* or ochre pellets; T12, treatment system with ochre pellets only; n, number of tested samples; SD, standard deviation; Min, minimum; Max, maximum; Rem, removal; NTU, nephelometric turbidity unit; na, not applicable.

**Table S2. Cont.**

e) LC–SGW (7–day HRT)

| <i>Parameter</i>                     | <i>Unit</i> | <i>7–day outflow (LC)–T13</i> |       |       |       |       |         | <i>7–day outflow (LC)–T14</i> |        |        |        |        |         |
|--------------------------------------|-------------|-------------------------------|-------|-------|-------|-------|---------|-------------------------------|--------|--------|--------|--------|---------|
|                                      |             | n                             | Mean  | SD    | Min   | Max   | Rem (%) | n                             | Mean   | SD     | Min    | Max    | Rem (%) |
| pH                                   | –           | 83                            | 6.9   | 0.61  | 6.2   | 9.0   | na      | 34                            | 10.3   | 1.33   | 7.7    | 12.3   | na      |
| Redox potential                      | mV          | 83                            | 31.0  | 28.12 | -75.5 | 68.9  | na      | 34                            | -130.8 | 63.74  | -217.6 | -1.8   | na      |
| Turbidity                            | NTU         | 83                            | 18.9  | 11.05 | 2.8   | 52.1  | 17.5    | 34                            | 25.1   | 16.21  | 2.9    | 77.8   | -9.6    |
| Total suspended solids               | mg/L        | 83                            | 27.7  | 16.48 | 2.8   | 72.0  | 30.6    | 34                            | 37.5   | 15.62  | 4.0    | 74.0   | 6.0     |
| Electrical conductivity              | µS/cm       | 83                            | 161.4 | 42.91 | 103.7 | 324.0 | na      | 34                            | 306.8  | 118.32 | 166.2  | 774.0  | na      |
| Dissolved oxygen                     | mg/L        | 83                            | 9.3   | 1.24  | 4.9   | 12.0  | 10.6    | 34                            | 8.7    | 0.94   | 7.0    | 10.7   | 16.3    |
| Colour                               | Pa/Co       | 83                            | 159.1 | 56.83 | 48.0  | 391.0 | 25.8    | 34                            | 250.6  | 120.15 | 47.0   | 647.0  | -16.8   |
| Temperature                          | °C          | 83                            | 15.9  | 4.18  | 7.3   | 22.4  | na      | 34                            | 17.3   | 4.31   | 7.3    | 22.3   | na      |
| Biochemical oxygen demand            | mg/L        | 83                            | 13.4  | 5.63  | 2.0   | 30.0  | 23.9    | 34                            | 5.5    | 6.00   | 0.0    | 28.0   | 68.8    |
| Chemical oxygen demand               | mg/L        | 83                            | 31.3  | 11.95 | 7.9   | 77.5  | -8.3    | 34                            | 29.2   | 10.71  | 20.3   | 63.4   | -1.0    |
| Ammonia–nitrogen                     | mg/L        | 83                            | 0.1   | 0.07  | 0.0   | 0.5   | 50.0    | 34                            | 0.1    | 0.07   | 0.0    | 0.3    | 50.0    |
| Nitrate–nitrogen                     | mg/L        | 83                            | 1.3   | 0.77  | 0.0   | 4.8   | 0.0     | 34                            | 0.7    | 0.77   | 0.0    | 3.7    | 46.2    |
| Ortho–phosphate–phosphorus           | mg/L        | 83                            | 11.9  | 6.36  | 3.3   | 32.0  | -41.7   | 34                            | 3.0    | 1.77   | 1.5    | 8.5    | 64.3    |
| <b><i>Element</i></b>                |             |                               |       |       |       |       |         |                               |        |        |        |        |         |
| Aluminium                            | mg/L        | 44                            | 0.12  | 0.094 | 0.00  | 0.24  | 76.92   | 24                            | 0.37   | 0.232  | 0.08   | 0.69   | 28.85   |
| Boron                                | mg/L        | 24                            | 0.13  | 0.069 | 0.08  | 0.29  | 7.14    | 20                            | 0.08   | 0.005  | 0.07   | 0.09   | 42.86   |
| Calcium                              | mg/L        | 52                            | 11.44 | 0.944 | 10.01 | 13.12 | -8.54   | 22                            | 60.11  | 13.881 | 38.50  | 75.27  | -470.30 |
| Cadmium                              | mg/L        | 32                            | 0.08  | 0.097 | 0.00  | 0.27  | 11.11   | 24                            | 0.02   | 0.021  | 0.00   | 0.06   | 77.78   |
| Chromium                             | mg/L        | 42                            | 0.05  | 0.069 | 0.00  | 0.21  | -25.00  | 34                            | 0.04   | 0.031  | 0.00   | 0.07   | 0.00    |
| Copper                               | mg/L        | 48                            | 0.07  | 0.081 | 0.00  | 0.22  | 56.25   | 36                            | 0.04   | 0.032  | 0.00   | 0.08   | 75.00   |
| Iron                                 | mg/L        | 38                            | 0.14  | 0.080 | 0.04  | 0.28  | 33.33   | 30                            | 0.39   | 0.218  | 0.16   | 0.65   | -85.71  |
| Potassium                            | mg/L        | 8                             | 2.99  | 0.216 | 2.72  | 3.29  | 25.99   | 8                             | 17.59  | 16.141 | 2.35   | 33.47  | -335.40 |
| Magnesium                            | mg/L        | 46                            | 1.55  | 0.195 | 1.18  | 1.91  | -6.90   | 30                            | 0.84   | 0.224  | 0.53   | 1.08   | 42.07   |
| Manganese                            | mg/L        | 48                            | 0.05  | 0.077 | 0.00  | 0.20  | 70.59   | 36                            | 0.04   | 0.033  | 0.00   | 0.09   | 76.47   |
| Sodium                               | mg/L        | 8                             | 13.91 | 1.648 | 12.10 | 15.47 | 2.86    | 8                             | 15.42  | 3.280  | 12.09  | 18.59  | -7.68   |
| Nickel                               | mg/L        | 44                            | 0.05  | 0.081 | 0.00  | 0.18  | -25.00  | 32                            | 0.00   | 0.012  | 0.00   | 0.06   | 100.00  |
| Zinc                                 | mg/L        | 28                            | 0.11  | 0.094 | 0.00  | 0.32  | 47.62   | 24                            | 0.06   | 0.050  | 0.00   | 0.14   | 71.43   |
| <b><i>7–day outflow (LC)–T15</i></b> |             |                               |       |       |       |       |         |                               |        |        |        |        |         |
| pH                                   | –           | 83                            | 7.5   | 0.72  | 6.4   | 9.3   | na      | 34                            | 10.5   | 1.05   | 8.0    | 12.2   | na      |
| Redox potential                      | mV          | 83                            | 1.8   | 33.00 | -87.9 | 53.2  | na      | 34                            | -131.3 | 72.36  | -217.6 | 156.0  | na      |
| Turbidity                            | NTU         | 83                            | 16.5  | 7.27  | 5.7   | 34.1  | 27.9    | 34                            | 40.9   | 25.03  | 4.0    | 113.0  | -78.6   |
| Total suspended solids               | mg/L        | 83                            | 25.0  | 10.96 | 7.0   | 56.0  | 37.3    | 34                            | 55.2   | 24.85  | 4.0    | 104.0  | -38.3   |
| Electrical conductivity              | µS/cm       | 83                            | 144.0 | 32.28 | 97.7  | 263.0 | na      | 34                            | 290.2  | 135.74 | 148.0  | 768.0  | na      |
| Dissolved oxygen                     | mg/L        | 83                            | 11.0  | 1.11  | 8.1   | 14.3  | -5.8    | 34                            | 10.1   | 0.84   | 8.3    | 11.2   | 2.9     |
| Colour                               | Pa/Co       | 83                            | 152.6 | 41.05 | 51.0  | 258.0 | 28.9    | 34                            | 283.8  | 115.21 | 48.0   | 544.0  | -32.3   |
| Temperature                          | °C          | 83                            | 15.3  | 4.23  | 6.7   | 22.2  | na      | 34                            | 17.0   | 4.15   | 7.9    | 22.1   | na      |
| Biochemical oxygen demand            | mg/L        | 83                            | 6.7   | 4.85  | 0.0   | 22.0  | 61.9    | 34                            | 5.4    | 3.95   | 0.0    | 20.0   | 69.3    |
| Chemical oxygen demand               | mg/L        | 83                            | 17.2  | 6.95  | 6.0   | 36.7  | 40.5    | 34                            | 19.9   | 7.28   | 3.9    | 32.2   | 31.1    |
| Ammonia–nitrogen                     | mg/L        | 83                            | 0.1   | 0.04  | 0.0   | 0.3   | 50.0    | 34                            | 0.1    | 0.15   | 0.0    | 0.8    | 50.0    |
| Nitrate–nitrogen                     | mg/L        | 83                            | 1.0   | 0.64  | 0.0   | 4.0   | 23.1    | 34                            | 0.3    | 0.28   | 0.0    | 1.1    | 76.9    |
| Ortho–phosphate–phosphorus           | mg/L        | 83                            | 8.5   | 4.03  | 2.6   | 19.6  | -10.0   | 34                            | 3.7    | 1.29   | 1.2    | 6.6    | 56.0    |
| <b><i>Element</i></b>                |             |                               |       |       |       |       |         |                               |        |        |        |        |         |
| Aluminium                            | mg/L        | 44                            | 0.36  | 0.189 | 0.09  | 0.75  | 30.77   | 24                            | 0.73   | 0.420  | 0.20   | 1.40   | -40.38  |
| Boron                                | mg/L        | 24                            | 0.12  | 0.064 | 0.08  | 0.26  | 14.29   | 20                            | 0.08   | 0.006  | 0.07   | 0.09   | 42.86   |
| Calcium                              | mg/L        | 52                            | 10.74 | 0.739 | 9.44  | 12.12 | -1.90   | 22                            | 65.46  | 37.361 | 23.48  | 104.98 | -521.06 |
| Cadmium                              | mg/L        | 32                            | 0.09  | 0.083 | 0.00  | 0.21  | 0.00    | 24                            | 0.05   | 0.046  | 0.00   | 0.11   | 44.44   |
| Chromium                             | mg/L        | 42                            | 0.07  | 0.074 | 0.00  | 0.21  | -75.00  | 34                            | 0.06   | 0.054  | 0.00   | 0.12   | -50.00  |
| Copper                               | mg/L        | 48                            | 0.10  | 0.091 | 0.00  | 0.26  | 37.50   | 36                            | 0.06   | 0.057  | 0.00   | 0.13   | 62.50   |
| Iron                                 | mg/L        | 38                            | 0.20  | 0.100 | 0.07  | 0.30  | 4.76    | 30                            | 0.93   | 0.759  | 0.15   | 1.91   | -342.86 |
| Potassium                            | mg/L        | 8                             | 3.62  | 0.438 | 3.07  | 4.22  | 10.40   | 8                             | 20.16  | 19.003 | 2.26   | 38.75  | -399.01 |
| Magnesium                            | mg/L        | 46                            | 1.38  | 0.161 | 1.03  | 1.64  | 4.83    | 30                            | 0.78   | 0.330  | 0.36   | 1.16   | 46.21   |
| Manganese                            | mg/L        | 48                            | 0.06  | 0.074 | 0.00  | 0.21  | 64.71   | 36                            | 0.10   | 0.094  | 0.00   | 0.21   | 41.18   |
| Sodium                               | mg/L        | 8                             | 13.15 | 1.199 | 11.83 | 14.36 | 8.17    | 8                             | 15.69  | 5.272  | 10.55  | 21.03  | -9.57   |
| Nickel                               | mg/L        | 44                            | 0.05  | 0.080 | 0.00  | 0.18  | -25.00  | 32                            | 0.01   | 0.010  | 0.00   | 0.05   | 75.00   |
| Zinc                                 | mg/L        | 28                            | 0.13  | 0.068 | 0.01  | 0.25  | 38.10   | 24                            | 0.11   | 0.089  | 0.00   | 0.26   | 47.62   |

*Note:* LC, low pollutant concentrations; T13, treatment system with only *P. australis*; T14, treatment system with *P. australis* and ochre pellets; T15, treatment system without *P. australis* or ochre pellets; T16, treatment system with only ochre pellets; n, number of tested samples; SD, standard deviation; Min, minimum; Max, maximum; Rem, removal; NTU, nephelometric turbidity unit; na, not applicable.

**Table S2. Cont.**

f) outflow of control wetlands

| <i>Parameter</i>                    | <i>Unit</i> | <i>2-day outflow (TW)–C1</i> |      |       |      |       | <i>2-day outflow (TW)–C2</i> |      |       |       |       |
|-------------------------------------|-------------|------------------------------|------|-------|------|-------|------------------------------|------|-------|-------|-------|
|                                     |             | n                            | Mean | SD    | Min  | Max   | n                            | Mean | SD    | Min   | Max   |
| pH                                  | –           | 85                           | 6.7  | 0.39  | 6.0  | 7.7   | 85                           | 7.4  | 0.60  | 6.2   | 9.3   |
| Redox potential                     | mV          | 85                           | 42.2 | 16.50 | -7.7 | 70.8  | 85                           | 9.6  | 28.10 | -72.2 | 78.4  |
| Turbidity                           | NTU         | 85                           | 9.3  | 6.61  | 2.0  | 39.3  | 85                           | 4.2  | 4.37  | 1.2   | 32.5  |
| Total suspended solids              | mg/L        | 85                           | 14.3 | 8.16  | 0.0  | 35.0  | 85                           | 3.9  | 2.93  | 0.0   | 15.0  |
| Electrical conductivity             | µS/cm       | 85                           | 84.4 | 12.15 | 57.2 | 117.7 | 85                           | 81.5 | 9.94  | 57.2  | 116.2 |
| Dissolved oxygen                    | mg/L        | 85                           | 9.0  | 0.87  | 7.2  | 11.8  | 85                           | 10.4 | 0.70  | 8.9   | 12.0  |
| Colour                              | Pa/Co       | 85                           | 44.3 | 30.56 | 6.0  | 168.0 | 85                           | 8.6  | 7.66  | 0.0   | 34.0  |
| Temperature                         | °C          | 85                           | 16.5 | 3.76  | 5.9  | 22.4  | 85                           | 16.8 | 4.04  | 6.0   | 22.8  |
| Biochemical oxygen demand           | mg/L        | 85                           | 7.3  | 3.45  | 0.0  | 18.0  | 85                           | 5.4  | 4.03  | 0.0   | 18.0  |
| Chemical oxygen demand              | mg/L        | 85                           | 15.9 | 7.74  | 4.9  | 42.8  | 85                           | 6.3  | 2.84  | 1.0   | 14.3  |
| Ammonia–nitrogen                    | mg/L        | 85                           | 0.1  | 0.12  | 0.0  | 0.6   | 85                           | 0.1  | 0.14  | 0.0   | 0.6   |
| Nitrate–nitrogen                    | mg/L        | 85                           | 1.1  | 0.75  | 0.1  | 3.8   | 85                           | 0.8  | 0.53  | 0.0   | 3.6   |
| Ortho–phosphate–phosphorus          | mg/L        | 85                           | 2.8  | 1.82  | 0.9  | 10.6  | 85                           | 2.4  | 0.63  | 0.9   | 4.3   |
| <b><i>Element</i></b>               |             |                              |      |       |      |       |                              |      |       |       |       |
| Aluminium                           | mg/L        | 24                           | 0.01 | 0.006 | 0.00 | 0.02  | 24                           | 0.01 | 0.007 | 0.00  | 0.02  |
| Boron                               | mg/L        | 20                           | 0.02 | 0.018 | 0.00 | 0.05  | 20                           | 0.03 | 0.009 | 0.01  | 0.05  |
| Calcium                             | mg/L        | 28                           | 9.96 | 0.549 | 9.06 | 10.90 | 28                           | 9.78 | 0.552 | 8.90  | 10.67 |
| Cadmium                             | mg/L        | 24                           | 0.01 | 0.006 | 0.00 | 0.02  | 24                           | 0.00 | 0.006 | 0.00  | 0.02  |
| Chromium                            | mg/L        | 34                           | 0.00 | 0.005 | 0.00 | 0.01  | 34                           | 0.00 | 0.005 | 0.00  | 0.01  |
| Copper                              | mg/L        | 36                           | 0.01 | 0.006 | 0.00 | 0.02  | 36                           | 0.01 | 0.008 | 0.00  | 0.03  |
| Iron                                | mg/L        | 30                           | 0.02 | 0.007 | 0.00 | 0.04  | 30                           | 0.02 | 0.009 | 0.00  | 0.04  |
| Potassium                           | mg/L        | 8                            | 0.35 | 0.049 | 0.27 | 0.42  | 8                            | 0.69 | 0.261 | 0.40  | 0.98  |
| Magnesium                           | mg/L        | 30                           | 1.10 | 0.123 | 0.77 | 1.27  | 30                           | 1.10 | 0.138 | 0.78  | 1.30  |
| Manganese                           | mg/L        | 36                           | 0.01 | 0.010 | 0.00 | 0.04  | 36                           | 0.00 | 0.009 | 0.00  | 0.03  |
| Sodium                              | mg/L        | 8                            | 6.62 | 0.721 | 5.82 | 7.31  | 8                            | 6.69 | 0.869 | 5.78  | 7.58  |
| Nickel                              | mg/L        | 32                           | 0.01 | 0.023 | 0.00 | 0.09  | 32                           | 0.01 | 0.023 | 0.00  | 0.10  |
| Zinc                                | mg/L        | 26                           | 0.03 | 0.009 | 0.00 | 0.03  | 26                           | 0.02 | 0.010 | 0.00  | 0.04  |
| <b><i>7-day outflow (TW)–C3</i></b> |             |                              |      |       |      |       |                              |      |       |       |       |
| pH                                  | –           | 83                           | 6.6  | 0.39  | 6.0  | 7.3   | 83                           | 7.1  | 0.52  | 5.9   | 8.9   |
| Redox potential                     | mV          | 83                           | 44.1 | 17.06 | 6.1  | 76.4  | 83                           | 25.1 | 24.68 | -60.9 | 89.8  |
| Turbidity                           | NTU         | 83                           | 12.7 | 12.56 | 1.5  | 69.9  | 83                           | 3.7  | 3.47  | 1.3   | 30.1  |
| Total suspended solids              | mg/L        | 83                           | 17.8 | 13.69 | 0.0  | 67.0  | 83                           | 4.3  | 5.79  | 0.0   | 38.0  |
| Electrical conductivity             | µS/cm       | 83                           | 92.9 | 27.28 | 60.7 | 167.2 | 83                           | 87.1 | 20.83 | 58.4  | 163.2 |
| Dissolved oxygen                    | mg/L        | 83                           | 8.9  | 1.09  | 5.7  | 11.2  | 83                           | 10.8 | 1.07  | 8.4   | 13.2  |
| Colour                              | Pa/Co       | 83                           | 56.1 | 31.45 | 11.0 | 143.0 | 83                           | 12.7 | 9.73  | 0.0   | 42.0  |
| Temperature                         | °C          | 83                           | 15.1 | 4.20  | 6.2  | 22.2  | 83                           | 15.5 | 4.17  | 7.2   | 22.0  |
| Biochemical oxygen demand           | mg/L        | 83                           | 9.1  | 5.05  | 0.0  | 22.0  | 83                           | 6.7  | 4.65  | 0.0   | 24.0  |
| Chemical oxygen demand              | mg/L        | 83                           | 17.6 | 6.74  | 6.3  | 35.2  | 83                           | 7.0  | 2.48  | 1.6   | 17.3  |
| Ammonia–nitrogen                    | mg/L        | 83                           | 0.1  | 0.04  | 0.0  | 0.2   | 83                           | 0.1  | 0.05  | 0.0   | 0.2   |
| Nitrate–nitrogen                    | mg/L        | 83                           | 0.9  | 0.42  | 0.0  | 2.8   | 83                           | 0.8  | 0.54  | 0.0   | 3.0   |
| Ortho–phosphate–phosphorus          | mg/L        | 83                           | 3.4  | 1.47  | 0.4  | 7.4   | 83                           | 2.4  | 0.86  | 0.5   | 4.6   |
| <b><i>Element</i></b>               |             |                              |      |       |      |       |                              |      |       |       |       |
| Aluminium                           | mg/L        | 39                           | 0.08 | 0.092 | 0.00 | 0.20  | 39                           | 0.09 | 0.101 | 0.00  | 0.22  |
| Boron                               | mg/L        | 23                           | 0.05 | 0.061 | 0.00 | 0.19  | 23                           | 0.05 | 0.059 | 0.00  | 0.19  |
| Calcium                             | mg/L        | 49                           | 9.67 | 0.591 | 8.41 | 10.70 | 49                           | 9.51 | 0.476 | 8.40  | 10.40 |
| Cadmium                             | mg/L        | 30                           | 0.04 | 0.071 | 0.00 | 0.19  | 30                           | 0.05 | 0.071 | 0.00  | 0.20  |
| Chromium                            | mg/L        | 40                           | 0.03 | 0.063 | 0.00 | 0.19  | 40                           | 0.03 | 0.063 | 0.00  | 0.19  |
| Copper                              | mg/L        | 45                           | 0.04 | 0.073 | 0.00 | 0.19  | 45                           | 0.05 | 0.078 | 0.00  | 0.20  |
| Iron                                | mg/L        | 36                           | 0.05 | 0.069 | 0.00 | 0.22  | 36                           | 0.05 | 0.066 | 0.00  | 0.20  |
| Potassium                           | mg/L        | 8                            | 0.50 | 0.492 | 0.03 | 1.01  | 8                            | 0.52 | 0.127 | 0.39  | 0.70  |
| Magnesium                           | mg/L        | 42                           | 1.20 | 0.119 | 0.88 | 1.40  | 42                           | 1.16 | 0.120 | 0.83  | 1.37  |
| Manganese                           | mg/L        | 45                           | 0.04 | 0.070 | 0.00 | 0.19  | 45                           | 0.04 | 0.069 | 0.00  | 0.18  |
| Sodium                              | mg/L        | 8                            | 6.80 | 0.085 | 6.69 | 6.90  | 8                            | 6.35 | 0.105 | 6.24  | 6.56  |
| Nickel                              | mg/L        | 41                           | 0.04 | 0.075 | 0.00 | 0.18  | 41                           | 0.04 | 0.075 | 0.00  | 0.18  |
| Zinc                                | mg/L        | 29                           | 0.04 | 0.070 | 0.00 | 0.24  | 29                           | 0.04 | 0.061 | 0.00  | 0.22  |

*Note:* TW, tap water; C1 and C3, treatment system with only *P. australis*; C2 and C4, treatment system with only tap water (TW); n, number of tested samples; SD, standard deviation; Min, minimum; Max, maximum; Rem, removal; NTU, nephelometric turbidity unit; na, not applicable.
