# Supplementary material
Source: MDPI journal article supplement (https://www.mdpi.com/2076-3298/11/3/44)
Supplement: s1 [file s1]

# Biomass Production and Metal Remediation by *Salix alba* L. and *Salix viminalis* L. Irrigated with Greywater Treated by Floating Wetlands

## Supplementary Material

**Table S3.** Trace element concentrations (mg/kg): (a) *S. alba* leaves; (b) *S. alba* twigs; (c) *S. viminalis* leaves; and (d) *S. viminalis* twigs.

| <i>S. alba</i>   |                | Element     |                   |               |               |              |               |                  |                |                |               |               |
|------------------|----------------|-------------|-------------------|---------------|---------------|--------------|---------------|------------------|----------------|----------------|---------------|---------------|
| <i>a) Leaves</i> | Aluminium (Al) | Boron (B)   | Calcium (Ca)      | Cadmium (Cd)  | Chromium (Cr) | Copper (Cu)  | Iron (Fe)     | Magnesium (Mg)   | Manganese (Mn) | Sodium (Na)    | Nickel (Ni)   | Zinc (Zn)     |
| SA1              | 1014.6±226.15  | 532.2±68.78 | 219208.3±19484.89 | 752.3±30.81   | 492.1±129.82  | 380.6±177.81 | 2590.7±259.00 | 93834.6±4582.78  | 3847.0±312.66  | 2870.8±86.13   | 355.4±155.45  | 2472.1±454.87 |
| SA2              | 954.6±411.68   | 490.6±77.81 | 217637.9±18553.69 | 725.2±33.35   | 241.1±62.25   | 352.6±231.76 | 1844.7±181.30 | 87802.0±4151.76  | 2972.5±172.93  | 3169.6±95.09   | 648.8±265.05  | 1704.9±805.50 |
| SA3              | 891.6±335.53   | 790.5±68.71 | 291965.1±26072.06 | 1227.3±649.48 | 266.7±89.49   | 557.9±386.79 | 2135.6±149.38 | 118658.8±5295.51 | 5634.8±219.10  | 1801.6±54.05   | 828.6±327.70  | 3089.4±635.79 |
| SA4              | 731.9±588.06   | 504.7±78.14 | 225411.8±19467.68 | 878.5±34.78   | 305.4±95.86   | 448.4±308.31 | 2036.0±106.45 | 97646.4±4601.27  | 2435.3±117.97  | 2147.8±64.43   | 584.2±362.19  | 1830.5±496.73 |
| SA5              | 883.9±227.40   | 554.3±54.58 | 229792.6±20275.64 | 466.2±83.24   | 346.2±121.47  | 448.4±321.97 | 2480.4±150.12 | 100726.8±4030.29 | 11856.5±261.86 | 2017.0±60.51   | 1008.3±791.90 | 2954.4±954.74 |
| SA6              | 1094.4±271.16  | 534.8±68.95 | 239494.3±21824.75 | 1069.9±192.72 | 256.6±74.55   | 451.0±285.78 | 2485.3±121.76 | 99172.7±4628.56  | 10546.9±347.46 | 3216.3±96.49   | 554.0±390.47  | 1466.1±900.18 |
| SA7              | 894.0±236.31   | 401.8±26.75 | 205824.2±18510.92 | 373.6±113.11  | 303.3±133.81  | 385.6±172.38 | 1902.3±185.08 | 95648.0±4307.97  | 9469.2±176.07  | 2643.0±79.29   | 329.5±185.31  | 1883.7±687.14 |
| SA8              | 964.2±330.72   | 543.4±59.86 | 216076.3±19510.16 | 415.0±55.40   | 281.1±133.26  | 330.6±135.83 | 2039.4±158.64 | 85798.8±3926.27  | 9096.8±103.21  | 2099.3±62.98   | 169.9±71.90   | 1587.8±640.71 |
| SA9              | 1046.0±248.40  | 594.9±48.09 | 262410.7±24796.45 | 691.6±40.04   | 255.6±130.47  | 479.3±271.55 | 2404.7±173.98 | 117279.1±5457.18 | 11076.2±313.59 | 2594.0±77.82   | 331.8±114.69  | 1760.8±977.91 |
| SA10             | 893.1±504.69   | 473.2±70.38 | 214305.2±19714.84 | 580.4±107.63  | 265.2±88.84   | 375.4±163.94 | 2228.1±107.78 | 96508.5±4380.31  | 8701.8±465.50  | 2809.7±84.29   | 290.3±149.12  | 1821.6±693.72 |
| SA11             | 996.2±265.00   | 514.2±78.27 | 228748.1±21445.34 | 736.5±72.35   | 268.3±92.11   | 385.3±135.80 | 2275.3±63.51  | 103342.9±5074.36 | 6543.8±451.03  | 2628.6±78.86   | 335.7±159.70  | 1612.5±536.18 |
| SA12             | 1343.4±419.08  | 544.6±58.39 | 215303.1±19605.44 | 1349.6±121.32 | 345.5±172.32  | 301.6±115.60 | 2360.4±221.75 | 101464.0±5123.53 | 7377.3±394.92  | 2138.8±64.16   | 675.1±272.60  | 1386.4±765.35 |
| SA13             | 1018.7±398.93  | 360.6±41.86 | 181743.7±16789.96 | 322.0±18.59   | 250.1±86.46   | 438.3±349.93 | 2372.0±198.78 | 80382.9±3547.61  | 2334.4±132.49  | 2723.0±81.69   | 851.7±347.78  | 1043.6±288.21 |
| SA14             | 1326.2±421.14  | 374.2±82.05 | 222009.5±19374.18 | 386.4±46.70   | 329.3±74.74   | 414.8±185.83 | 2692.2±117.94 | 90238.7±4031.32  | 2711.4±309.61  | 3397.3±101.92  | 360.7±118.75  | 1826.9±334.78 |
| SA15             | 1515.4±576.86  | 642.1±61.99 | 270884.8±23746.97 | 648.3±53.89   | 356.5±167.31  | 342.3±99.11  | 2803.2±49.24  | 110564.2±5756.50 | 9451.3±320.20  | 2446.1±73.38   | 592.7±314.09  | 1586.1±575.14 |
| SA16             | 1333.3±803.45  | 332.0±36.90 | 184383.6±16803.57 | 302.9±25.60   | 286.1±84.79   | 497.9±256.88 | 2172.5±92.75  | 73335.8±3484.06  | 1625.4±349.92  | 2694.4±80.83   | 512.1±296.17  | 1779.1±883.53 |
| SA/C1            | 982.3±409.21   | 422.3±87.13 | 179737.7±16003.38 | 562.8±42.53   | 307.9±105.73  | 402.1±209.50 | 2172.1±158.87 | 72682.2±3498.75  | 6200.9±142.60  | 2791.3±83.74   | 506.6±541.21  | 1127.3±631.04 |
| SA/C2            | 864.1±259.25   | 371.2±52.22 | 173119.4±15218.63 | 575.7±60.72   | 375.6±164.38  | 401.6±258.11 | 2604.4±108.18 | 78409.8±4088.97  | 2734.5±140.75  | 3207.5±96.26   | 865.8±483.86  | 1064.3±485.57 |
| SA/C3            | 1069.3±261.16  | 434.3±62.30 | 200735.8±18478.38 | 365.9±86.65   | 263.7±120.64  | 491.8±209.38 | 1930.7±107.41 | 87255.6±4859.29  | 6559.1±196.02  | 2696.9±80.91   | 517.0±433.08  | 1770.5±521.50 |
| SA/C4            | 1367.5±200.15  | 468.4±49.20 | 227092.4±20177.31 | 300.2±81.81   | 317.7±148.02  | 587.6±391.96 | 3064.4±187.42 | 99081.0±5183.62  | 4882.1±409.70  | 2820.2±84.61   | 575.0±843.84  | 1390.0±861.60 |
| <i>b) Twigs</i>  |                |             |                   |               |               |              |               |                  |                |                |               |               |
| SA1              | 626.5±436.40   | 121.1±57.63 | 71371.7±6445.89   | 810.7±99.95   | 210.5±122.99  | 273.1±138.85 | 876.2±373.70  | 24893.3±1163.97  | 1988.2±266.91  | 3081.4±92.44   | 354.7±107.75  | 2348.4±607.95 |
| SA2              | 633.1±434.67   | 88.7±35.51  | 55701.2±4588.28   | 617.6±131.02  | 233.9±94.17   | 244.8±163.25 | 651.1±156.82  | 21818.8±910.95   | 481.1±222.83   | 4988.4±149.65  | 210.5±46.65   | 1996.9±329.71 |
| SA3              | 859.7±669.39   | 68.0±34.31  | 60208.7±5271.69   | 607.9±57.17   | 228.7±71.64   | 447.7±266.71 | 634.9±234.70  | 21349.4±942.02   | 686.5±212.02   | 2663.0±79.89   | 298.5±26.43   | 2158.2±455.74 |
| SA4              | 510.3±364.77   | 71.6±12.98  | 62283.0±4883.44   | 656.0±27.88   | 251.0±69.86   | 550.7±638.27 | 709.7±365.65  | 19950.5±984.84   | 525.6±73.68    | 5095.7±152.87  | 485.0±70.59   | 1711.0±357.89 |
| SA5              | 404.0±293.16   | 65.4±13.24  | 63716.3±5338.09   | 258.5±43.05   | 364.4±180.50  | 624.1±395.21 | 827.4±250.61  | 30641.7±1654.11  | 2272.9±176.27  | 10751.9±322.56 | 275.8±58.40   | 1317.4±612.17 |
| SA6              | 478.3±422.91   | 91.2±33.86  | 64747.3±5040.05   | 263.7±58.56   | 288.1±201.89  | 453.8±320.18 | 864.4±210.41  | 30352.3±2190.73  | 2079.4±166.56  | 8597.9±257.94  | 458.6±54.73   | 1834.0±423.70 |
| SA7              | 702.6±306.42   | 43.3±25.99  | 70793.6±5913.35   | 313.0±62.92   | 301.0±139.75  | 302.1±139.68 | 676.8±289.21  | 25400.8±1123.45  | 1871.1±267.00  | 8985.1±269.55  | 394.0±43.86   | 1575.7±324.42 |
| SA8              | 460.4±362.44   | 55.2±6.12   | 65272.4±5767.73   | 503.5±62.48   | 290.1±125.45  | 413.3±112.74 | 753.2±271.88  | 24954.0±1039.61  | 2329.0±202.01  | 2576.6±77.30   | 293.1±37.82   | 1906.4±529.64 |
| SA9              | 655.3±307.31   | 122.2±43.51 | 74657.0±6675.20   | 393.0±186.48  | 224.8±99.87   | 256.4±168.37 | 723.6±228.52  | 26755.9±1343.57  | 2186.3±298.22  | 6880.6±206.42  | 315.0±75.98   | 2449.7±720.50 |
| SA10             | 700.1±456.53   | 67.0±26.81  | 65825.7±5872.23   | 1041.9±846.86 | 320.2±123.75  | 392.8±300.81 | 680.2±114.60  | 25533.2±1416.39  | 1545.7±112.29  | 4520.1±135.60  | 271.9±86.64   | 1035.4±226.71 |
| SA11             | 720.5±314.72   | 97.2±34.58  | 62529.6±5316.59   | 820.1±254.52  | 255.9±118.66  | 359.9±173.70 | 606.4±236.05  | 18335.1±944.39   | 1480.8±216.80  | 1480.7±44.42   | 198.9±11.44   | 1966.2±421.55 |
| SA12             | 591.4±492.62   | 44.9±24.88  | 48852.6±3856.51   | 641.2±146.53  | 276.0±168.18  | 447.7±265.09 | 664.0±297.55  | 19369.1±1015.46  | 1692.2±375.59  | 1253.7±37.61   | 197.5±63.96   | 2451.4±642.26 |
| SA13             | 609.4±372.82   | 77.5±26.98  | 84018.5±7550.00   | 617.5±549.49  | 340.5±237.54  | 375.6±245.68 | 770.0±192.54  | 28267.2±1282.05  | 659.3±214.54   | 2097.6±62.93   | 253.2±66.42   | 1998.0±299.80 |
| SA14             | 642.4±210.35   | 123.0±58.43 | 86712.2±7839.26   | 516.2±310.22  | 249.6±97.61   | 334.0±165.20 | 812.7±484.89  | 32435.1±1730.50  | 770.7±207.96   | 4479.5±134.38  | 205.6±60.05   | 2214.0±493.80 |
| SA15             | 539.6±310.12   | 92.5±40.23  | 72879.3±6455.18   | 241.6±56.19   | 274.4±137.09  | 293.9±89.62  | 625.0±173.91  | 23544.6±1240.69  | 2163.2±87.00   | 475.4±14.26    | 348.6±51.69   | 1969.7±308.23 |
| SA16             | 698.2±478.77   | 83.3±43.43  | 85203.5±7624.41   | 340.9±80.57   | 305.9±116.16  | 301.6±134.81 | 677.1±163.29  | 27570.8±1514.47  | 594.7±178.30   | 1241.4±37.24   | 258.0±35.65   | 1575.4±290.81 |
| SA/C1            | 651.8±270.90   | 81.4±25.31  | 69617.8±6080.77   | 476.9±359.46  | 214.3±63.76   | 287.4±157.76 | 713.7±287.90  | 25585.1±1473.28  | 1744.1±129.70  | 2514.1±75.42   | 319.0±30.00   | 1368.3±385.56 |
| SA/C2            | 610.7±275.99   | 110.0±55.92 | 82128.3±7136.11   | 267.7±38.17   | 368.3±296.73  | 326.2±257.44 | 605.9±297.21  | 23894.3±1072.35  | 2381.0±114.88  | 1063.0±31.89   | 229.5±89.55   | 2188.9±482.86 |
| SA/C3            | 869.1±495.99   | 81.0±34.00  | 66878.4±5773.74   | 848.2±842.54  | 256.4±118.27  | 368.0±171.51 | 746.5±240.87  | 20271.8±952.76   | 1666.0±222.96  | 1646.2±49.39   | 494.0±45.69   | 1905.3±111.77 |
| SA/C4            | 644.9±314.84   | 93.1±43.03  | 63275.6±6074.87   | 347.0±160.38  | 301.1±168.03  | 342.9±171.92 | 709.0±259.77  | 16489.4±785.70   | 1022.9±70.84   | 413.8±12.41    | 245.5±35.19   | 1851.1±310.39 |

**Note:** All values in mg/kg of dry weight as mean±standard deviation; and SA1–SA/C4, *S. alba* with two replicates.

Table S2. *Cont.*

| <i>S. viminalis</i> | Element        |              |                   |                |               |               |               |                  |                |              |                  |                  |
|---------------------|----------------|--------------|-------------------|----------------|---------------|---------------|---------------|------------------|----------------|--------------|------------------|------------------|
| <i>c) Leaves</i>    | Aluminium (Al) | Boron (B)    | Calcium (Ca)      | Cadmium (Cd)   | Chromium (Cr) | Copper (Cu)   | Iron (Fe)     | Magnesium (Mg)   | Manganese (Mn) | Sodium (Na)  | Nickel (Ni)      | Zinc (Zn)        |
| SV1                 | 888.9±409.28   | 595.0±57.57  | 182407.3±17725.00 | 960.7±857.09   | 276.4±149.62  | 414.4±336.01  | 1833.6±431.47 | 106708.1±5790.44 | 1799.0±313.55  | 1567.7±47.03 | 425.2967±326.01  | 1593.7±1151.88   |
| SV2                 | 730.1±167.50   | 609.0±100.71 | 206096.1±20146.47 | 740.1±59.02    | 268.8±201.19  | 675.7±504.56  | 1642.1±332.04 | 98979.6±4433.37  | 3349.7±52.40   | 1552.4±46.57 | 221.5167±107.72  | 2081.582±777.57  |
| SV3                 | 1075.4±670.07  | 543.2±85.86  | 178441.8±17126.98 | 1514.3±319.06  | 239.0±129.78  | 573.6±407.55  | 1749.5±348.69 | 99037.0±4453.27  | 3738.5±121.72  | 1718.1±51.54 | 616.2104±706.96  | 2556.054±1023.40 |
| SV4                 | 954.3±486.70   | 602.5±93.83  | 192686.5±18166.02 | 1046.2±849.95  | 300.0±149.55  | 405.2±181.80  | 1659.1±238.40 | 95055.2±4946.20  | 3101.2±458.15  | 1665.0±49.95 | 277.2302±66.08   | 1548.823±850.08  |
| SV5                 | 939.3±395.10   | 444.3±98.47  | 174260.6±16144.90 | 254.0±150.94   | 278.9±112.57  | 386.1±230.65  | 1571.9±286.86 | 82258.5±4227.62  | 1466.7±92.60   | 2154.7±64.64 | 296.4001±293.56  | 974.8228±461.55  |
| SV6                 | 858.7±239.43   | 448.6±98.56  | 185598.6±17714.29 | 287.8±66.31    | 289.0±120.22  | 332.0±198.69  | 1959.6±297.06 | 90874.7±4165.08  | 1751.5±287.65  | 1674.3±50.23 | 216.5648±130.29  | 1360.073±1207.92 |
| SV7                 | 1066.3±750.59  | 652.6±87.44  | 180687.2±17017.70 | 388.2±98.53    | 290.6±117.85  | 643.1±506.89  | 1682.2±356.26 | 94512.3±4884.31  | 5358.8±319.28  | 2407.9±72.24 | 472.4579±629.85  | 1541.238±652.88  |
| SV8                 | 909.6±134.72   | 717.7±60.50  | 208411.0±20835.33 | 422.4±131.22   | 327.2±153.70  | 376.2±286.69  | 2186.2±350.73 | 102420.8±5311.74 | 5481.7±147.84  | 2266.7±68.00 | 752.6834±1297.47 | 1589.146±598.65  |
| SV9                 | 915.2±198.65   | 682.7±47.27  | 230405.4±22266.98 | 1212.4±918.55  | 281.7±126.27  | 474.0±377.51  | 2307.2±441.58 | 115548.1±5398.61 | 4273.4±267.86  | 1908.0±57.24 | 1197.239±1907.67 | 1658.443±782.90  |
| SV10                | 973.2±201.45   | 607.1±81.21  | 197409.1±19089.49 | 924.8±116.69   | 272.7±101.56  | 487.9±334.24  | 2035.7±250.03 | 96400.8±5063.47  | 6547.0±131.52  | 2166.0±64.98 | 551.7473±853.34  | 2211.442±889.18  |
| SV11                | 840.9±414.99   | 674.3±77.81  | 269069.7±25792.86 | 1169.1±604.17  | 229.7±118.07  | 417.8±195.39  | 2508.4±460.03 | 144048.6±7128.82 | 8756.4±266.00  | 2685.8±80.58 | 207.7071±147.36  | 3187.566±1043.15 |
| SV12                | 996.3±216.11   | 559.1±68.81  | 205957.2±19930.13 | 985.6±636.92   | 312.9±195.25  | 433.1±251.19  | 1938.8±309.08 | 96336.8±4347.74  | 1876.4±402.98  | 2515.7±75.47 | 597.5088±669.62  | 1275.324±460.14  |
| SV13                | 1066.5±335.63  | 686.7±57.41  | 236340.6±23135.36 | 1634.0±550.50  | 1074.4±94.96  | 394.8±206.051 | 3439.0±283.61 | 113057.0±5861.20 | 8141.6±183.33  | 3117.5±93.52 | 717.8036±1156.31 | 2091.974±684.10  |
| SV14                | 956.3±165.16   | 733.8±40.81  | 271610.3±25505.30 | 758.6±812.07   | 323.1±144.24  | 518.6±229.83  | 2327.6±355.95 | 148510.5±7321.95 | 7555.3±294.73  | 2036.9±61.11 | 344.1969±237.64  | 2220.612±1275.08 |
| SV15                | 996.8±551.74   | 645.3±92.16  | 233845.3±22065.41 | 395.5±150.58   | 278.7±106.55  | 317.2±200.36  | 2601.9±418.51 | 122275.4±5308.58 | 8374.0±223.35  | 2870.4±86.11 | 1101.441±2391.71 | 2097.214±1117.23 |
| SV16                | 978.7±303.36   | 477.1±112.40 | 208362.3±20190.62 | 293.4±29.57    | 304.4±122.75  | 307.0±185.30  | 2015.2±468.75 | 107453.3±4916.15 | 6749.5±221.64  | 2088.7±62.66 | 392.703±520.21   | 1361.001±465.53  |
| SV/C1               | 777.3±746.54   | 489.0±65.83  | 206241.6±19929.01 | 591.3±596.42   | 245.9±89.82   | 424.8±224.85  | 1868.6±257.90 | 105843.8±5527.46 | 7031.1±185.62  | 2300.0±69.00 | 616.2759±797.93  | 1720.073±1045.77 |
| SV/C2               | 1284.6±554.79  | 577.7±41.93  | 231906.7±21569.92 | 543.9±528.78   | 257.7±112.40  | 353.7±191.57  | 1989.8±392.27 | 117418.0±5675.12 | 8199.5±304.60  | 1904.2±57.13 | 756.1612±1371.18 | 2018.204±1306.60 |
| SV/C3               | 1099.1±448.83  | 777.7±91.76  | 244978.0±23712.08 | 271.9±166.73   | 239.9±85.10   | 547.6±316.16  | 2818.2±346.70 | 101465.9±4315.85 | 9784.1±423.94  | 2692.5±80.78 | 312.7323±310.45  | 3319.01±552.46   |
| SV/C4               | 915.3±202.12   | 590.3±75.95  | 244822.0±23568.26 | 1053.7±1322.15 | 268.5±75.82   | 425.4±148.81  | 2325.0±255.42 | 119757.6±5441.71 | 8765.4±232.99  | 3161.4±94.84 | 967.2933±1753.34 | 2229.864±663.77  |
| <i>d) Twigs</i>     |                |              |                   |                |               |               |               |                  |                |              |                  |                  |
| SV1                 | 831.6±350.73   | 266.3±53.40  | 79302.0±6970.72   | 689.5±85.61    | 211.2±81.67   | 646.3±672.42  | 680.3±355.34  | 36600.3±2496.59  | 821.6±202.13   | 694.4±20.83  | 764.0±55.66      | 1879.4±1281.35   |
| SV2                 | 624.7±314.48   | 215.5±56.83  | 88175.3±8517.48   | 1054.4±412.17  | 286.6±128.98  | 551.9±786.44  | 628.6±371.04  | 37009.0±1916.98  | 1491.1±241.67  | 707.2±21.22  | 247.9±80.16      | 1157.4±306.08    |
| SV3                 | 766.3±468.45   | 176.7±68.75  | 85682.2±7638.32   | 1109.4±933.93  | 313.2±82.57   | 346.6±228.68  | 715.9±160.66  | 41657.2±2467.14  | 1007.2±129.29  | 808.8±24.27  | 443.9±558.11     | 1657.0±947.49    |
| SV4                 | 617.2±279.33   | 207.4±34.89  | 71587.0±6778.65   | 858.6±278.27   | 258.9±121.41  | 380.4±330.53  | 683.1±249.73  | 32373.8±1949.54  | 1609.2±136.04  | 657.6±19.73  | 1103.6±970.12    | 1190.5±499.88    |
| SV5                 | 595.4±441.93   | 181.8±74.93  | 86657.3±8343.29   | 1020.7±946.06  | 319.2±131.31  | 245.2±134.76  | 721.9±383.09  | 31953.2±1759.97  | 796.8±60.84    | 922.7±27.68  | 301.9±155.63     | 1125.8±974.52    |
| SV6                 | 715.0±324.12   | 160.5±88.00  | 71684.2±6894.44   | 363.4±180.90   | 329.8±192.43  | 335.6±253.31  | 758.6±323.62  | 31837.1±1638.67  | 767.7±260.83   | 950.5±28.51  | 253.3±64.25      | 1206.0±367.94    |
| SV7                 | 722.0±449.04   | 237.3±132.60 | 85680.9±8204.11   | 367.6±168.93   | 214.9±84.46   | 420.0±276.78  | 577.7±132.59  | 36116.1±2264.42  | 1192.3±214.31  | 786.4±23.60  | 203.5±118.13     | 1172.6±777.87    |
| SV8                 | 924.7±830.68   | 97.9±16.56   | 50019.9±4511.05   | 868.2±642.89   | 303.0±97.30   | 353.7±340.55  | 773.5±155.97  | 22430.1±1128.83  | 1492.4±304.08  | 439.6±13.19  | 495.4±608.25     | 1552.8±1270.86   |
| SV9                 | 847.6±676.14   | 160.0±45.31  | 73847.2±7012.21   | 542.9±290.64   | 313.7±144.18  | 329.6±320.65  | 696.6±232.07  | 38112.6±2740.34  | 1506.1±332.19  | 718.9±21.57  | 436.1±585.71     | 1816.6±1413.49   |
| SV10                | 534.2±235.63   | 191.3±27.76  | 72340.2±6769.53   | 824.6±146.26   | 256.0±114.66  | 348.3±178.55  | 772.9±294.13  | 41876.0±2003.67  | 2674.5±142.49  | 666.1±19.98  | 844.1±337.48     | 2537.9±2567.90   |
| SV11                | 690.9±418.52   | 133.2±63.89  | 72391.0±7181.07   | 997.9±401.98   | 262.8±119.35  | 327.5±111.17  | 689.3±556.58  | 39252.7±2379.66  | 2153.9±123.54  | 931.8±27.95  | 268.9±162.11     | 1340.5±963.74    |
| SV12                | 607.9±468.09   | 135.7±19.72  | 59262.9±5673.70   | 538.0±78.98    | 218.5±70.87   | 488.8±363.85  | 632.3±196.35  | 24127.7±1444.29  | 653.3±155.17   | 628.9±18.87  | 245.0±81.50      | 764.8±270.86     |
| SV13                | 498.2±333.78   | 90.9±20.49   | 64703.0±5949.49   | 772.3±1003.01  | 326.6±217.72  | 432.0±199.71  | 748.1±408.61  | 32276.7±1959.66  | 2217.5±259.52  | 823.7±24.7   | 167.1±139.97     | 1025.1±529.78    |
| SV14                | 663.6±359.38   | 107.0±57.99  | 76959.7±6805.11   | 467.8±473.66   | 270.4±115.56  | 360.7±243.25  | 744.9±249.41  | 47309.8±2761.65  | 2441.3±104.13  | 730.6±21.92  | 589.3±662.45     | 1191.0±409.47    |
| SV15                | 656.7±320.31   | 95.9±16.34   | 69951.9±6150.19   | 673.4±687.55   | 239.2±59.96   | 292.2±98.03   | 772.5±250.94  | 47898.0±2683.47  | 2236.2±278.04  | 480.1±14.40  | 185.7±87.90      | 1249.0±830.12    |
| SV16                | 798.4±763.36   | 149.8±29.83  | 81911.6±8123.03   | 714.0±839.33   | 252.8±109.95  | 369.5±151.88  | 771.2±308.25  | 42625.2±2290.72  | 2567.0±69.30   | 529.2±15.88  | 328.3±165.07     | 1545.7±1151.02   |
| SV/C1               | 577.5±349.44   | 120.1±14.36  | 86581.1±8153.00   | 275.5±42.41    | 255.1±48.58   | 322.1±231.53  | 755.4±184.94  | 42762.5±2687.78  | 2547.6±173.63  | 330.1±9.90   | 512.8±639.48     | 2239.0±1428.16   |
| SV/C2               | 679.3±395.74   | 133.6±22.79  | 87198.7±8286.41   | 607.5±627.99   | 268.5±120.29  | 236.7±49.17   | 795.1±266.92  | 42625.0±2404.61  | 2720.1±183.30  | 966.0±28.98  | 424.7±532.56     | 1443.0±1091.28   |
| SV/C3               | 701.9±469.23   | 108.3±21.34  | 86070.3±8439.08   | 276.6±40.45    | 226.8±109.52  | 658.3±580.95  | 766.0±363.04  | 40636.0±2248.58  | 2725.4±401.49  | 1089.8±32.69 | 288.5±257.32     | 1867.4±1519.19   |
| SV/C4               | 702.9±355.39   | 117.9±41.73  | 75215.2±6614.88   | 276.3±50.60    | 322.7±163.55  | 419.3±271.74  | 695.5±424.14  | 39903.6±2320.13  | 2629.1±232.95  | 691.1±20.73  | 310.3±280.59     | 1101.0±347.52    |

**Note:** All values in mg/kg of dry weight as (mean±standard deviation); and SV1–SV/C4, *S. viminalis* with two replicates.
