# Supplementary material
Source: MDPI journal article supplement (https://www.mdpi.com/2076-3298/11/3/44)
Supplement: s1 [file s1]

# Biomass Production and Metal Remediation by *Salix alba* L. and *Salix viminalis* L. Irrigated with Greywater Treated by Floating Wetlands

## Supplementary Material

**Table S1.** Chemical formulas of synthetic greywaters (SGW) for low (LC) and high (HC) pollutant concentrations.

| Item | Chemical name                   | Chemical formula                                                | Molar mass<br>(g/mol) | SGW recipe (mg/L) |        | Composition percentages                                    |
|------|---------------------------------|-----------------------------------------------------------------|-----------------------|-------------------|--------|------------------------------------------------------------|
|      |                                 |                                                                 |                       | LC                | HC     |                                                            |
| 1    | Kaolin                          | $\text{Al}_2\text{Si}_2\text{O}_5(\text{OH})_4$                 | 258.16                | 15                | 100    | Al (20.90%), H (1.56%), O (55.78%) and Si (21.76%)         |
| 2    | Cellulose                       | $(\text{C}_6\text{H}_{10}\text{O}_5)_n$                         | 162.14                | 15                | 100    | C (44.45%), H (6.22%) and O (49.34%)                       |
| 3    | Humic acid                      | $\text{C}_{187}\text{H}_{186}\text{O}_{89}\text{N}_9\text{S}_1$ | 4015.55               | 5                 | 20     | C (55.90%), H (4.67%), O (35.46%), N (4.67%) and S (0.80%) |
| 4    | Sodium chloride                 | $\text{NaCl}$                                                   | 58.44                 | 10                | 120    | Cl (60.66%) and Na (39.34%)                                |
| 5    | Sodium hydrogen carbonate       | $\text{NaHCO}_3$                                                | 84.01                 | 10                | 85     | C (14.30%), H (1.20%), Na (27.37%) and O (57.14%)          |
| 6    | Calcium chloride                | $\text{CaCl}_2$                                                 | 147.02                | 10                | 55     | Ca (36.11%) and Cl (63.89%)                                |
| 7    | Potassium nitrate               | $\text{KNO}_3$                                                  | 101.10                | 0                 | 90     | K (38.67%), N (13.85%) and O (47.48%)                      |
| 8    | Calcium nitrate                 | $\text{Ca}(\text{NO}_3)_2$                                      | 164.09                | 0                 | 150    | Ca (24.43%), N (17.07%) and O (58.50%)                     |
| 9    | Magnesium sulphate              | $\text{MgSO}_4$                                                 | 120.37                | 2                 | 240    | Mg (20.19%), S (26.64%) and O (53.17%)                     |
| 10   | Monopotassium phosphate         | $\text{KH}_2\text{PO}_4$                                        | 136.09                | 13                | 85     | H (1.48%), K (28.73%), O (47.03%) and P (22.76%)           |
| 11   | Iron(III)chloride               | $\text{FeCl}_3$                                                 | 162.20                | 0.3               | 50.0   | Fe (34.43%) and Cl (65.57%)                                |
| 12   | Boric acid                      | $\text{H}_3\text{BO}_3$                                         | 61.83                 | 0.6               | 3.0    | H (4.89%), B (17.48%) and O (77.63%)                       |
| 13   | Manganese(II)chloride           | $\text{MnCl}_2$                                                 | 125.84                | 0.03              | 3.20   | Cl (56.34%) and Mn (43.66%)                                |
| 14   | Zinc sulphate                   | $\text{ZnSO}_4$                                                 | 161.44                | 0.25              | 15.00  | O (39.64%), S (19.86%) and Zn (40.50%)                     |
| 15   | Copper sulphate                 | $\text{CuSO}_4$                                                 | 159.61                | 0.025             | 7.00   | Cu (39.81%), O (40.10%) and S (20.09%)                     |
| 16   | Ammonium molybdate tetrahydrate | $(\text{NH}_4)_6\text{Mo}_7\text{O}_{24}$                       | 1163.94               | 0.35              | 0.35   | H (2.08%), Mo (57.71%), N (7.22%) and O (32.99%)           |
| 17   | Cadmium oxide                   | $\text{CdO}$                                                    | 128.41                | 0.02              | 12.50  | Cd (87.54%) and O (12.46%)                                 |
| 18   | Nickel oxide                    | $\text{NiO}$                                                    | 74.69                 | 0.02              | 0.06   | Ni (78.58%) and O (21.42%)                                 |
| 19   | Chromium(III)nitrate            | $\text{CrN}_3\text{O}_9$                                        | 99.99                 | 0.045             | 70.00  | Cr (21.85%), N (17.65%) and O (60.50%)                     |
| 20   | Sodium sulphate                 | $\text{Na}_2\text{SO}_4$                                        | 142.04                | 2.60              | 25.00  | Na (32.37%), O (45.06%) and S (22.57%)                     |
| 21   | Sodium phosphate monobasic      | $\text{H}_2\text{NaPO}_4$                                       | 119.98                | 0.00              | 250.00 | H (1.68%), Na (19.16%), O (53.34%) and P (25.82%)          |
| 22   | Lead(II)oxide                   | $\text{Pb}_3\text{O}_4$                                         | 685.60                | 0.16              | 1.40   | Pb (90.67%) and O (9.33%)                                  |

**Note:** Al, aluminium; H, hydrogen; O, oxygen; Si, silicon; C, carbon; N, nitrogen; S, sulphur; Cl, chlorine; Na, sodium; Ca, calcium; K, potassium; Mg, magnesium; P, phosphorus; Fe, iron; B, boron; Mn, manganese; Zn, zinc; Cu, copper; Mo, molybdenum; Cd, Cadmium; Ni, nickel; Cr, chromium; and Pb, lead.
